# Supplementary material for: New Markers for Cardiovascular Disease in Psoriatic Patients: Preliminary Study on Monocyte Phenotype, ADAMTS7, and mTOR Activity
Source: MDPI journal article supplement (doi:10.3390/metabo13010116), 2023-01-11
Supplement: s1 [file s1]

SUP. FIGURE 1

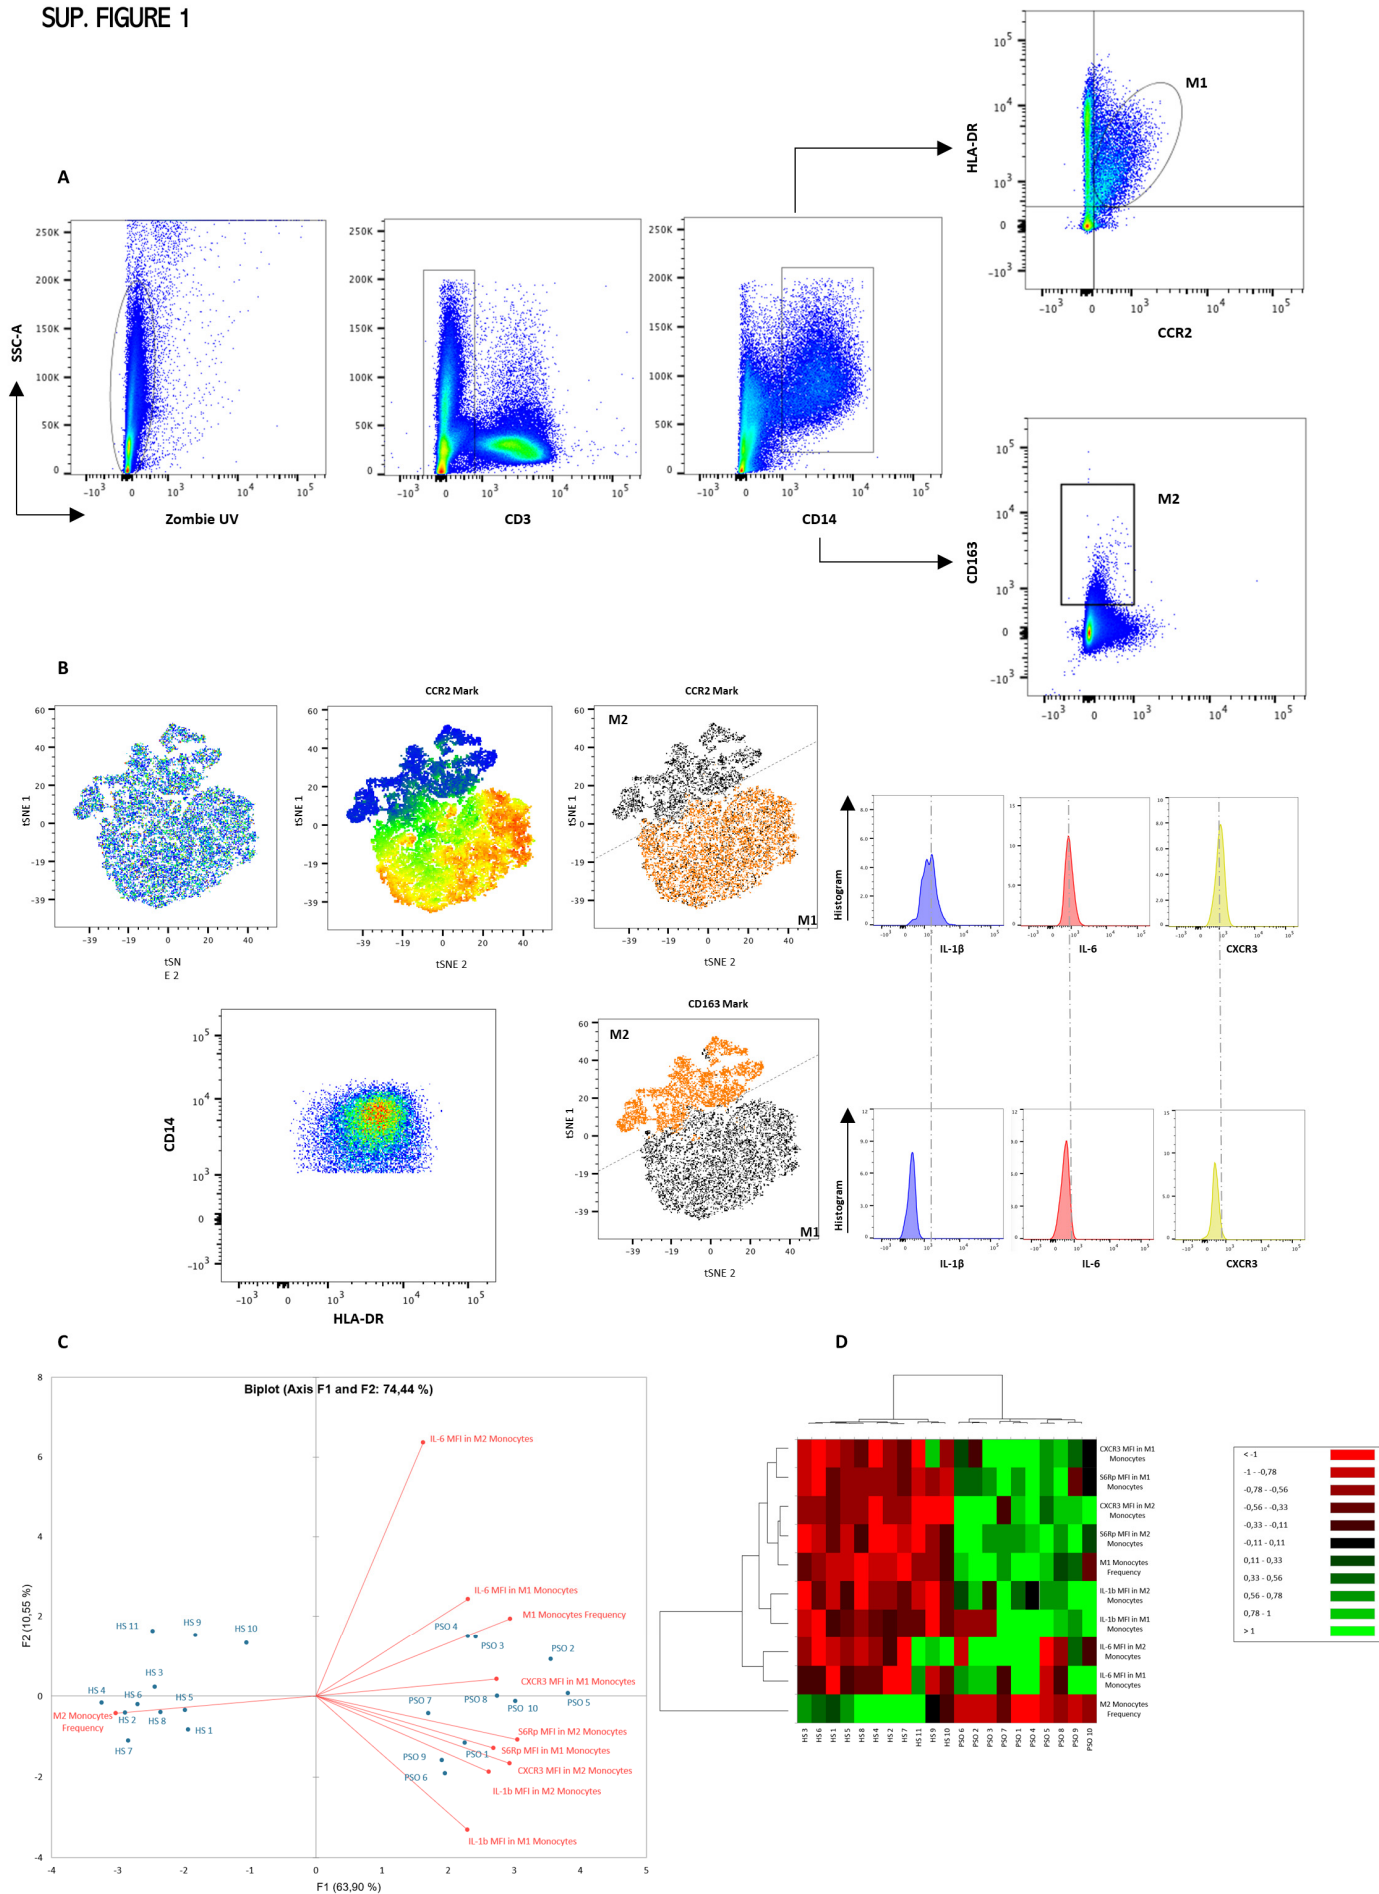

**Supplementary Figure S1:** Surface, intracellular, and serum variables analysis performing dimensional reduction using t-SNE and Principal Component Analysis.

(A) Gating strategy from a representative psoriatic patient. Monocytes were first negatively selected for CD3 and subsequently selected among CD14<sup>+</sup> cells for HLA-DR+CCR2<sup>+</sup> in M1 and CD163+CCR2<sup>-</sup> M2 monocytes. (B) t-SNE simultaneously analyzes all variables, showing inflammatory markers in two identified distinctive subpopulations. (C) Biplot of all patients and variables and their co-localization in a PC1 vs. PC2 bidimensional graph. (D) Heatmap showing distribution and relative intensity of fluorescence values in all patients.

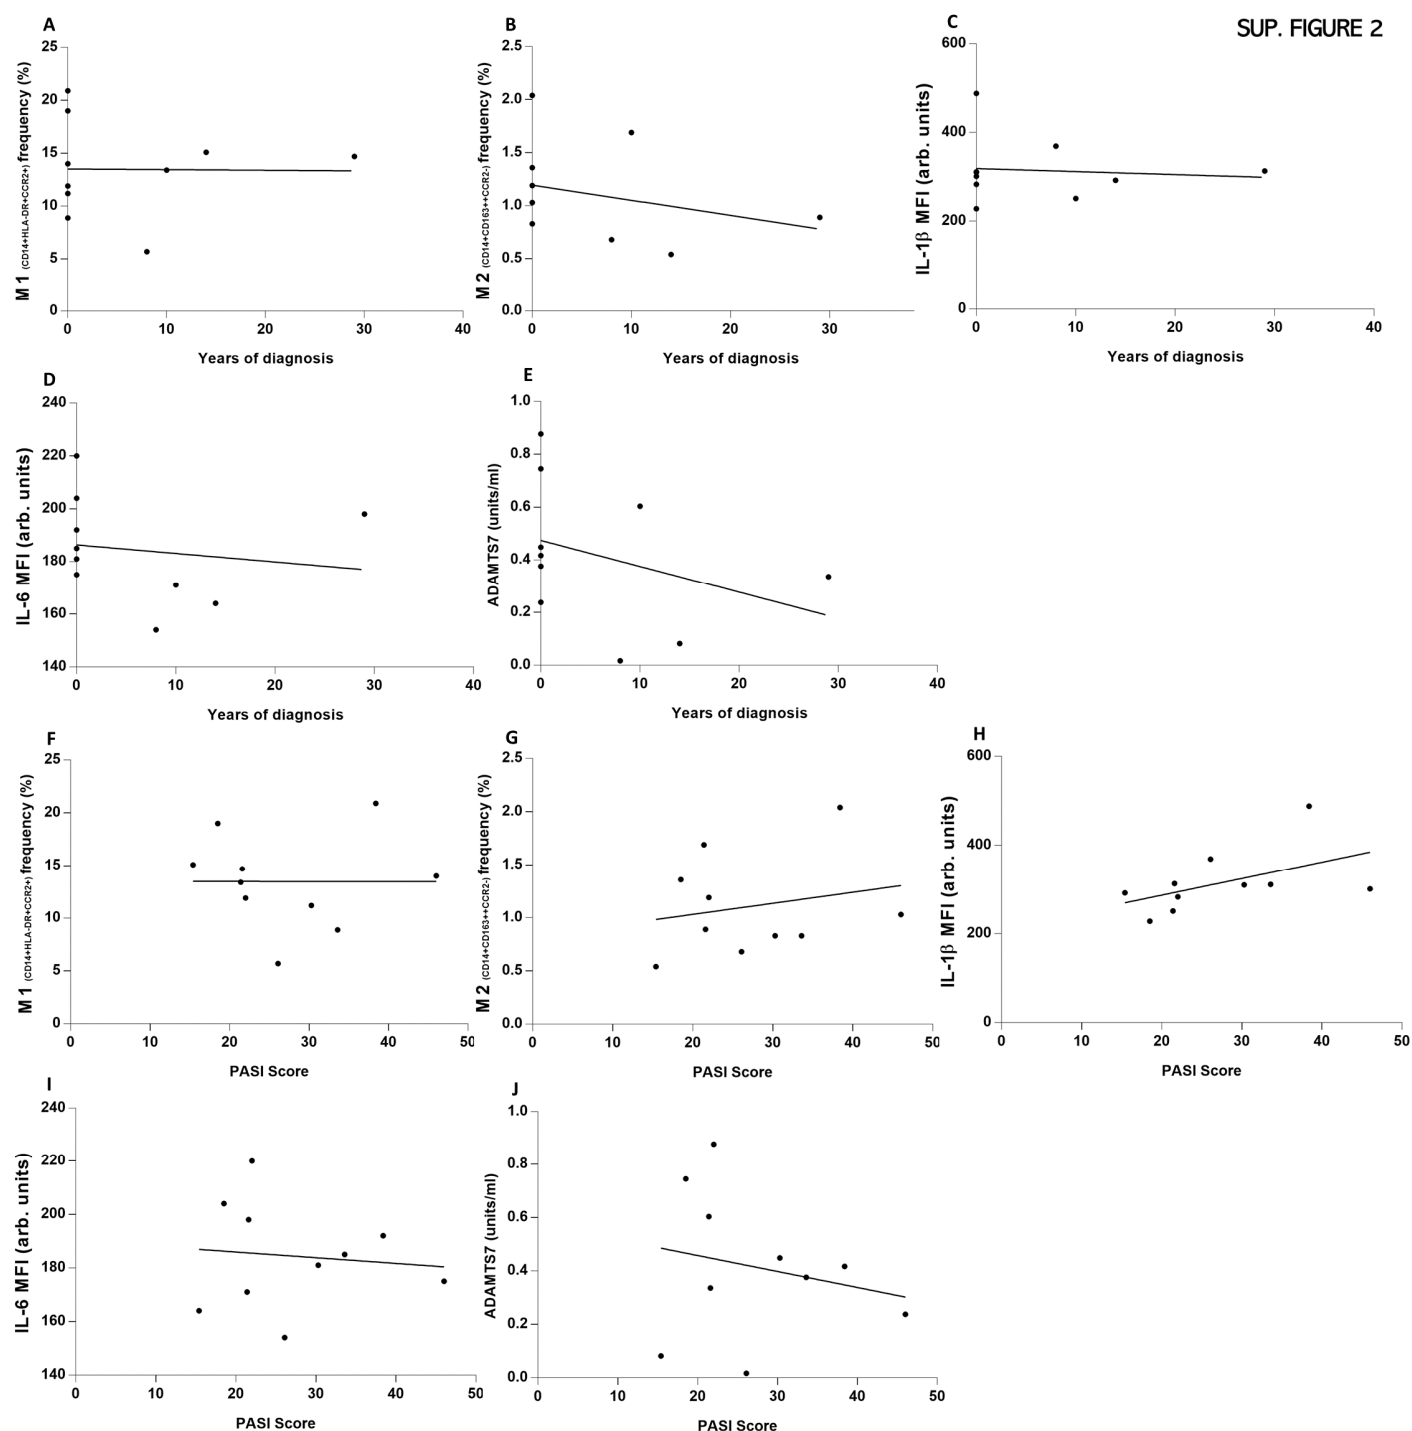

**Supplementary Figure S2:** Correlation analysis between clinical features, intracellular cytokine levels, serum ADAMTS7, and monocyte phenotype.

(A to E) Correlation between Years from Diagnosis and M1 and M2 frequency, IL-1 $\beta$  MFI, IL-6 MFI, and Serum ADAMTS7. (F to J) Correlation between PASI Score and M1 and M2 frequency, IL-1 $\beta$  MFI, IL-6 MFI, and Serum ADAMTS7. No correlations were found. Spearman's rank correlation tests were used.
